# Supplementary material
Source: Elsevier journal article supplement (https://www.sciencedirect.com/science/article/pii/S0213911118300396)
Supplement: mmc1 [file S0213911118300396:mmc1.docx]

**Apéndice online**

**Tabla I**

Resumen de los estudios, las variables y los métodos utilizados

| **Estudio (año)** | **Variables** | **Modelo estadístico** |
| --- | --- | --- |
| Beaver (1966) | 1. Net Income to Total Debt 2. Net Income to Sales 3. Net Income to Net Worth 4. Cash Flow to Total Debt 5. Cash Flow to Total Assets | Modelo univariable |
| Altman (1968) | X1: Working Capital/Total Assets  X2: Retained Earnings/Total Assets  X3: EBIT/ Total Assets  X4: Market Value of Equity/Book Value of Total Debt  X5: Sales/Total Assets | Análisis discriminante múltiple |
| Ohlson (1980) | X1: log(total assets/GNP Price-level index)  X2: total liabilities/total assets  X3: working capital/total assets  X4: current liabilities/current assets  X5: 1 if total liabilities excedes total assets; 0 otherwise  X6: net income/total assets  X7: fund provided by operations/total liabilities  X8: 1 if net income was negative for last two years, 0 otherwise  X9: (NIt – Nit-1) / (|NIt| + |NIt-1|) where NIt is net income for the most recent period | Modelo *logit* |
| Zmijewski (1984) | X1: Net income/Total assets  X2: Total Liabilities / Total assets  X3: Current Assets / Current Liabilities | Modelo *probit* |
| Odom y Sharda (1990) | X1: Working Capital/Total Assets  X2: Retained Earnings/Total Assets  X3: EBIT/ Total Assets  X4: Market Value of Equity/Book Value of Total Debt  X5: Sales/Total Assets | Inteligencia artificial |
| Altman (2000) | X1: Working Capital/Total Assets  X2: Retained Earnings/Total Assets  X3: EBIT/ Total Assets  X4: Book Values of Equity/Book Value of Total Debt  X5: Sales/Total Assets | Análisis discriminante múltiple |
| Shin y Lee (2001) | X1: Net income to stockholder’s equity  X2: Quick ratio  X3: Liquidity ratio  X4: Current liability to total assets  X5: Retained earnings to total assets  X6: Stockholders’ equity to total assets  X7: Financial expenses to sales | Inteligencia artificial  Algoritmos genéticos |

**Tabla II**

Gasto sanitario respecto del producto interior bruto (PIB) en países de la Unión Europea

| País | Gasto sanitario total respecto PIB | Gasto sanitario público respecto PIB | Gasto sanitario privado respecto PIB |
| --- | --- | --- | --- |
| España | 9,0 % | 6,3 % | 2,7 % |
| Francia | 11,0 % | 8,6 % | 2,4 % |
| Italia | 9,0 % | 6,8 % | 2,2 % |
| Reino Unido | 9,7 % | 7,7 % | 2,0 % |
| Suecia | 11,1 % | 9,3 % | 1,8 % |
| Alemania | 11,1 % | 9,4 % | 1,7 % |
| Total Unión Europea | 9,9 % | 7,8 % | 2,1 % |

**Tabla III**

Estadística descriptiva de la muestra utilizada

| **CNAE (descripción)** | **Empresas activas**  **n (%)** | **Empresas en concurso de acreedores**  **n (%)** |
| --- | --- | --- |
| 2110: Fabricación de productos farmacéuticos en base | 68 (1,17) | 2 (2,53) |
| 2120: Fabricación de especialidades farmacéuticas | 147 (2,52) | 0 (0) |
| 3250: Fabricación de instrumentos y suministros médicos y odontológicos | 160 (2,75) | 4 (5,06) |
| 4646: Comercio al por mayor de productos farmacéuticos | 767 (13,17) | 4 (5,06) |
| 4773: Comercio al por menor de productos farmacéuticos en establecimientos especializados | 150 (2,58) | 0 (0) |
| 4774: Comercio al por menor de artículos médicos y ortopédicos en establecimientos especializados | 525 (9,01) | 2 (2,53) |
| 7211: Investigación y desarrollo experimental en biotecnología | 37 (0,64) | 1 (1,27) |
| 7219: Otra investigación y desarrollo experimental en ciencias naturales y técnicas | 153 (2,63) | 9 (11,39) |
| 7490: Otras actividades profesionales, científicas y técnicas n.c.o.p. | 1256 (21,57) | 35 (44,3) |
| 8610: Actividades hospitalarias | 206 (3,54) | 1 (1,27) |
| 8621: Actividades de medicina general | 237 (4,07) | 5 (6,33) |
| 8622: Actividades de medicina especializada | 541 (9,29) | 4 (5,06) |
| 8623: Actividades odontológicas | 695 (11,93) | 3 (3,8) |
| 8690: Otras actividades sanitarias | 882 (15,14) | 9 (11,39) |
| Total | 5824 (100) | 79 (100) |

**Tabla IV**

Tabla de confusión de los modelos con el fichero test y con todos los registros [frecuencia (%)]

| Datos | Modelo | Clase actual | Predicción | |  |
| --- | --- | --- | --- | --- | --- |
| Concurso acreedores | Activa | Total |
| Fichero test | AG | Concurso acreedores | 4.453 (56,37) | 3.447 (43,63) | 7.900 |
| Activa | 1.130 (14,30) | 6.770 (85,70) | 7.900 |
| Z-Score Altman | Concurso acreedores | 4.200 (53,16) | 3.700 (46,84) | 7.900 |
| Activa | 1.212 (15,34) | 6.688 (84,66) | 7.900 |
| Todos los registros | AG | Concurso acreedores | 48 (60,76) | 31 (39,24) | 79 |
| Activa | 845 (14,51) | 4.979 (85,49) | 5.824 |
| Z-Score Altman | Concurso acreedores | 42 (53,16) | 37 (46,84) | 79 |
| Activa | 964 (16,55) | 4.860 (83,45) | 5.824 |


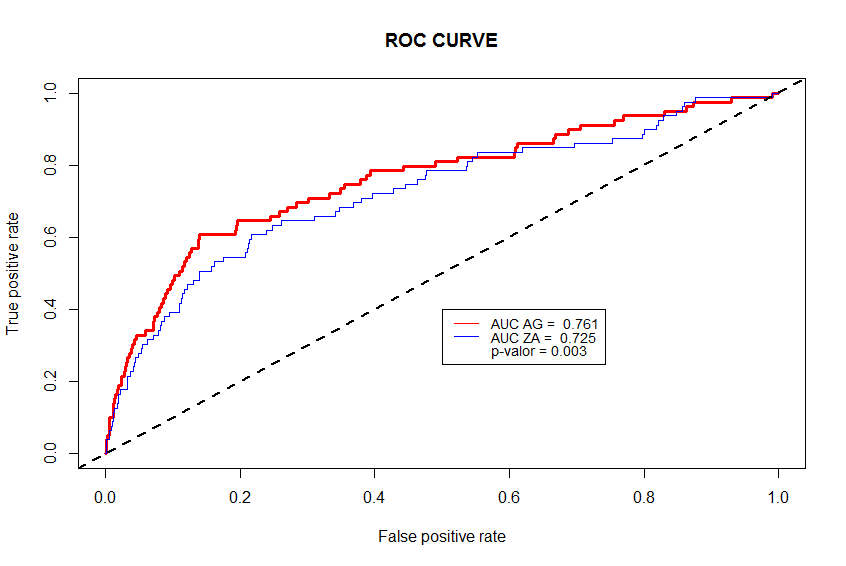


**Figura I.** Comparación de las curvas ROC entre el modelo AG y la Z-Score de Altman.
